# Supplementary material for: MEP50/PRMT5-mediated methylation activates GLI1 in Hedgehog signalling through inhibition of ubiquitination by the ITCH/NUMB complex
Source: PubMed Central journal article supplement (PMC6338668; doi:10.1038/s42003-018-0275-4), 2019-01-18
Supplement: 42003_2018_275_MOESM2_ESM.pdf [file 42003_2018_275_MOESM2_ESM.pdf]

## **Description of Additional Supplementary Files**

**File name:** Supplementary\_Data\_1

**Description:** Source data of Figure 3.

**File name:** Supplementary\_Data\_2

**Description:** Source data of Figure 6d–f.
